# Supplementary material
Source: publisher figshare collection journal article supplement (https://acs.figshare.com/ndownloader/files/22169262)
Supplement: Supplementary file 1 [file 22169262]

# Supporting Information

## Molecular mechanisms of chromium(III) immobilization by organo-ferrihydrite coprecipitates: The significant roles of ferrihydrite and carboxyl

Jianjun Yang<sup>a,b\*</sup>, Xing Xia<sup>a</sup>, Jin Liu<sup>c</sup>, Jian Wang<sup>d</sup>, Yongfeng Hu<sup>d</sup>

<sup>a</sup> Institute of Environment and Sustainable Development in Agriculture,  
Chinese Academy of Agricultural Sciences, Beijing 100081, China

<sup>b</sup> Key Laboratory of Argo-Environment, Ministry of Agriculture and Rural Affairs, Beijing  
100081, China

<sup>c</sup> College of Agronomy and Biotechnology, China Agricultural University, Beijing 100094,  
China

<sup>d</sup> Canadian Light Source Inc., University of Saskatchewan, Saskatoon, S7N 2V3 Canada

Number of pages: 16

Number of tables: 5

Number of figures: 13

**\*Corresponding author:** yangjianjun@caas.cn, phone: 86-10-82015996.

**1 Cr(III) adsorbed on Ferrihydrite (Fh) (Fh-Cr(III)), amorphous Cr(OH)<sub>3</sub> (Cr(OH)<sub>3</sub>(am)) and organo-Cr(III) complexes (OC-Cr(III)) synthesis**

The Fh was synthesized following the method described by Schwertmann and Cornell.<sup>1</sup> Briefly, the pH of 0.1 M FeCl<sub>3</sub> solution was adjusted to ~7 using a 0.1 M NaOH solution. After shaking for 24 h, the suspension was separated by centrifugation and the paste was washed twice to remove residual ions using Mili-Q water, and then freeze-dried for 48 h. The adsorption of Cr(III) to Fh was conducted by mixing 20 mg dried Fh with 20 mL 0.1 mM CrCl<sub>3</sub> solution in a 50 ml plastic tube. To prevent the possible formation of Cr(OH)<sub>3</sub> precipitation on the surface of Fh, a low pH of 4.5 was kept during the adsorption experiment. The sorption result showed that the 80% Cr(III) was removed from solution to Fh. According to the Cr(III) binding sites density of Fh (1.3 sites nm<sup>-2</sup>) and the specific surface area (SSA) of Fh (305.05 m<sup>2</sup> g<sup>-1</sup>) (Table S2, IS), ~11.6% Cr(III) binding sites of Fh were occupied by Cr(III), which suggested no Cr(OH)<sub>3</sub> surface precipitates formation in the product.<sup>2</sup> Therefore, the adsorption product should be theoretically predominant as Fh-Cr(III). However, Cr(III) surface hydroxyl polymers, having a similar structure with Cr(OH)<sub>3</sub>, most probably presented on the Fh surface instead of isolated Cr atoms according to previous study.<sup>2</sup>

The synthesis method of amorphous chromium(III) hydroxide (Cr(OH)<sub>3</sub>(am)) was same as the Fh. The Cr(OH)<sub>3</sub>(am) rather than crystalline Cr(OH)<sub>3</sub> was selected as a standard reference because NaOH solution was used to adjust pH, and thus no crystalline Cr(OH)<sub>3</sub> formed in this study.<sup>3</sup> This was because the synthesis of crystalline Cr(OH)<sub>3</sub> required NH<sub>3</sub>H<sub>2</sub>O or KOH solutions.<sup>4, 5</sup>

The OC-Cr(III) was made by mixing 60 mg L<sup>-1</sup> rice or rape DOC with 0.1 mM CrCl<sub>3</sub> at

pH of 4.5. The paste of OC-Cr(III) was obtained by centrifugation and washed twice with Mili-Q water to remove residual DOC or Cr(III). Then the paste was freeze-dried for XANES measurements. Since there is little difference of Cr K-edge XANES between rice and rape derived OC-Cr(III) (data are not shown). In this study, we chose rice derived OC-Cr(III) as a standard compound for further bulk XANES analysis.

## **2 XRD, SEM-EDS and BET measurements**

All the OFC samples were freeze-dried and ground into powders for further characterization. XRD analysis was conducted at ambient conditions using Cu-K $\alpha$  radiation produced with 40 kV and 30 mA electron beam. SEM-EDS analysis was performed using scanning electron microscope (SEM) (Zeiss Auriga Compact) in conjunction with energy dispersive X-ray spectroscopy (EDS) (X-MAX80). The SSA of the OFC was determined through measurements of N<sub>2</sub> gas adsorption isotherms after degassing.

## **3 C K-edge and Cr L-edge XANES**

Bulk C K-edge XANES spectra were collected at the beamline BL08U at the Shanghai Synchrotron Radiation Facility (SSRF) in China.<sup>6, 7</sup> The two DOC stocking solutions were freeze-dried and the deposited samples were ground into powders. Then the OC powders and oxalic acid reference were attached onto Cu tape fixed by a holder for spectral collection in the total electron yield mode. To improve the signal-to-noise ratio, at least of two scans were conducted for each sample and then all the spectra were processed using Athena software.<sup>8</sup>

## **4 STXM data analysis**

The Stack Analyze, aXis2000 software package were applied for the alignment of image sequence and spectra processing. After alignment, the equation: optical density (OD) =  $\ln(I_0/I)$

was used to convert data to optical density, where  $I$  referred to the flux passed through the sample, and the  $I_0$  (incident flux) was obtained by measuring an empty region without samples. The C, Fe and Cr distribution maps were obtained by subtracting average images at the pre-edge range from the averaged images for each element. The energy ranges were listed in Table S5. The C K-edge, Cr and Fe  $L_{3,2}$ -edge XANES spectra of the selected regions of interest (ROIs) of the sorption and co-precipitation experiments were derived using aXis2000 software, and plotted using origin 8.5 for fingerprint analysis. PCA-Cluster analysis of the sorption and co-precipitation samples were processed using PCA GUI (1.1.1) software.

### 5 Impact of pH increase on Cr(III) precipitation in $\text{CrCl}_3$ solution

The solution of 0.1 mM  $\text{CrCl}_3$  was prepared in two replicates by dissolving  $\text{CrCl}_3$  chemicals in 10 mM NaCl solution, and the pH of 0.1 mM  $\text{CrCl}_3$  was determined. Then NaOH solution was used to adjust the pH of the  $\text{CrCl}_3$  solution to the experimental pH (5.5). After shaking at 200 rpm for 24 hours at 25 °C, the  $\text{CrCl}_3$  solution were centrifuged at 5,000 rpm for 15 mins, and the supernatants of the  $\text{CrCl}_3$  solution were filtrated using 0.45  $\mu\text{m}$  membrane filters to determine the concentrations of soluble Cr using ICP-OES (Agilent 5110). The removal of the Cr in the solution was calculated by the difference between the initial added Cr and the remaining Cr in the supernatants.

### 6 Additional results

Table S1. The contents of interested elements in the rice and rape straw-derived DOC.

|      | C<br>(mg L <sup>-1</sup> ) | N<br>(mg L <sup>-1</sup> ) | Al<br>(mg L <sup>-1</sup> ) | Ca<br>(mg L <sup>-1</sup> ) | Fe<br>(mg L <sup>-1</sup> ) | K<br>(mg L <sup>-1</sup> ) | Mn<br>(mg L <sup>-1</sup> ) | P<br>(mg L <sup>-1</sup> ) | S<br>(mg L <sup>-1</sup> ) |
|------|----------------------------|----------------------------|-----------------------------|-----------------------------|-----------------------------|----------------------------|-----------------------------|----------------------------|----------------------------|
| Rice | 2476.5                     | 1364.1                     | 0.9                         | 6.1                         | 3.7                         | 1677.2                     | 44.9                        | 36.2                       | 77.6                       |
| Rape | 2077.1                     | 1390.5                     | 0.2                         | 214.4                       | 0.5                         | 1834.7                     | 0.4                         | 88.8                       | 282.3                      |

Table S2. Final Fe/C molar ratios and SSA of OFC formed under different initial solution Fe/C molar ratios.

| DOC  | Initial Fe/C in solution | Fe/C in OFC <sup>a</sup> | SSA (m <sup>2</sup> g <sup>-1</sup> ) |
|------|--------------------------|--------------------------|---------------------------------------|
| -    | control                  | -                        | 305.05                                |
| Rice | 10                       | 11.31                    | 317.06                                |
|      | 0.5                      | 0.53                     | 0.15                                  |
|      | 0.1                      | 0.02                     | 1.08                                  |
| Rape | 10                       | 9.94                     | 294.02                                |
|      | 0.5                      | 0.52                     | _ <sup>b</sup>                        |
|      | 0.1                      | 0.01                     | 1.01                                  |

<sup>a</sup>The Fe/C molar ratio in OFC was calculated through the difference of Fe, C concentrations in solution before and after reactions.

<sup>b</sup> The SSA is under the detection limit with our sample weight.

Table S3. Results of the first four components obtained from PCA analysis on Cr K-edge XANES spectra of the studied OFC samples.

| Components  | Eigenvalue | Variation | Accumulated variation | IND    |
|-------------|------------|-----------|-----------------------|--------|
| Component 1 | 113.8      | 0.925     | 0.925                 | 0.0295 |
| Component 2 | 7.091      | 0.057     | 0.983                 | 0.0058 |
| Component 3 | 0.901      | 0.007     | 0.990                 | 0.0043 |
| Component 4 | 0.479      | 0.003     | 0.994                 | 0.0032 |

Table S4. Linear combination fitting results of the Cr K-edge XANES spectra of the OFCs from the sorption and co-precipitation experiments under different Fe/C molar ratios. The standard deviation is shown in the bracket

| Sample      | Goodness of fit |          | Percentage of Cr(III) species |            |                     |
|-------------|-----------------|----------|-------------------------------|------------|---------------------|
|             | R factor        | $\chi^2$ | Fh-Cr(III)                    | OC-Cr(III) | Cr(OH) <sub>3</sub> |
| Sor_control | 0.0003          | 0.0395   | 90 (3)                        |            | 10 (3)              |
| Sor_Ri_0.5  | 0.0006          | 0.0815   | 68 (6)                        | 32 (6)     |                     |
| Sor_Ra_0.5  | 0.0005          | 0.0739   | 52 (6)                        | 48 (6)     |                     |
| Sor_Ri_0.1  | 0.0003          | 0.0483   | 27 (5)                        | 73 (5)     |                     |

|             |        |        |         |         |        |
|-------------|--------|--------|---------|---------|--------|
| Sor_Ra_0.1  | 0.0002 | 0.0335 | 62 (4)  | 38 (4)  |        |
| Cop_control | 0.0014 | 0.1903 | 77 (7)  |         | 23 (7) |
| Cop_Ri_0.5  | 0.0017 | 0.2254 | 75 (11) | 25 (11) |        |
| Cop_Ra_0.5  | 0.0050 | 0.6034 | 73 (17) | 27 (17) |        |
| Cop_Ri_0.1  | 0.0011 | 0.1436 | 70 (8)  | 30 (8)  |        |
| Cop_Ra_0.1  | 0.0005 | 0.0779 | 53 (6)  | 47 (6)  |        |

Table S5. Pre-edge energy and edge-energy ranges used for the generation of average stack maps using STXM data.

| Element      | Absorption edge | Pre-edge energy stack range (eV) | Edge energy stack range (eV) |
|--------------|-----------------|----------------------------------|------------------------------|
| Total C      | K               | 280-282                          | 300-320                      |
| Aromatic C   |                 | 280-282                          | 285.2-285.8                  |
| Aliphatic C  |                 | 280-282                          | 287.1-287.9                  |
| Carboxylic C |                 | 280-282                          | 288.3-288.9                  |
| Fe           | L               | 700-704                          | 709.0-709.8                  |
| Cr           | L               | 570-572                          | 577.2-578.1                  |

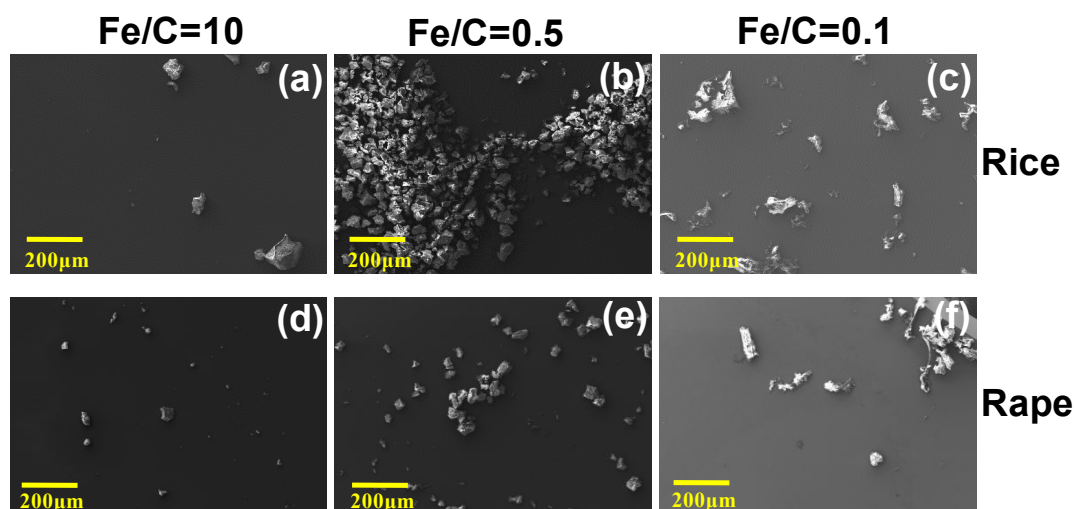

Figure S1. SEM images of the OFC under different Fe/C molar ratios at a relative large scale.

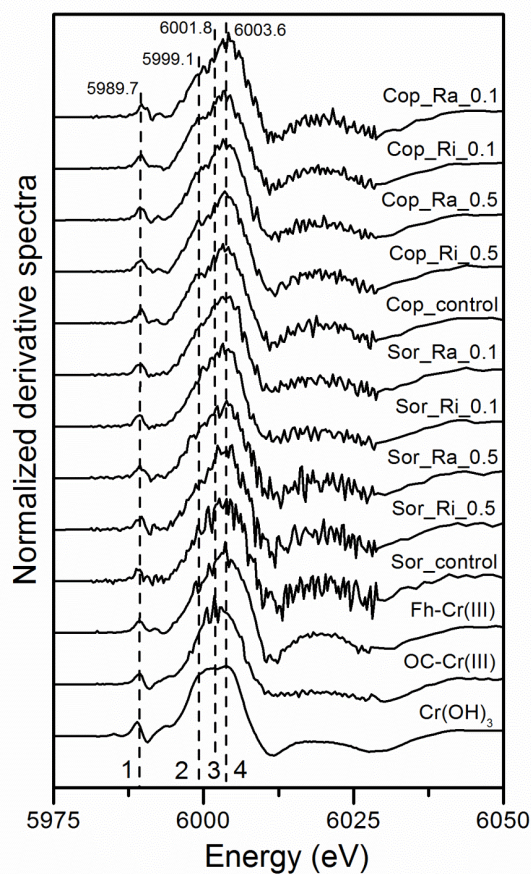

Figure S2. The first derivative spectra of Cr K-edge XANES spectra of OFC and standards (a). Sor\_Ri\_10 or Cop\_Ra\_10 refer to the OFC with Cr produced from adsorption or co-precipitation in the presence of DOCri or DOCra at the Fe/C molar ratio of 10, respectively, the others were named similarly.

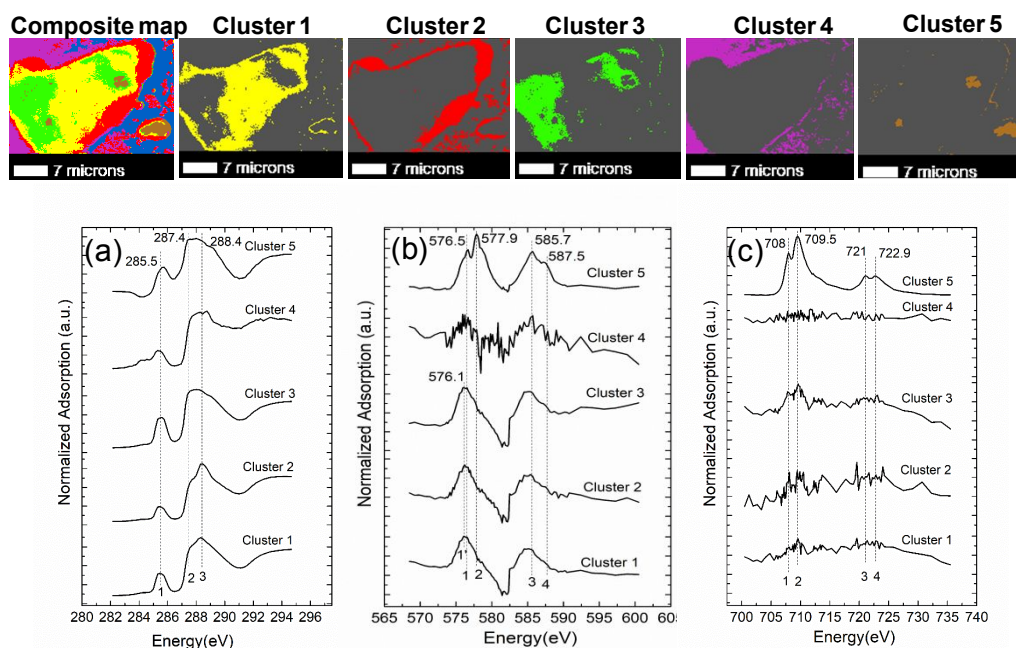

Figure S3. The PCA-cluster results of the sorption OFC sample synthesized using rice-derived DOC under the Fe/C molar ratio of 0.1 (Sor\_Ri\_0.1). Corresponding C K-edge, Cr and Fe L<sub>3,2</sub>-edge XANES spectra of each cluster identified is shown in (a), (b) and (c), respectively.

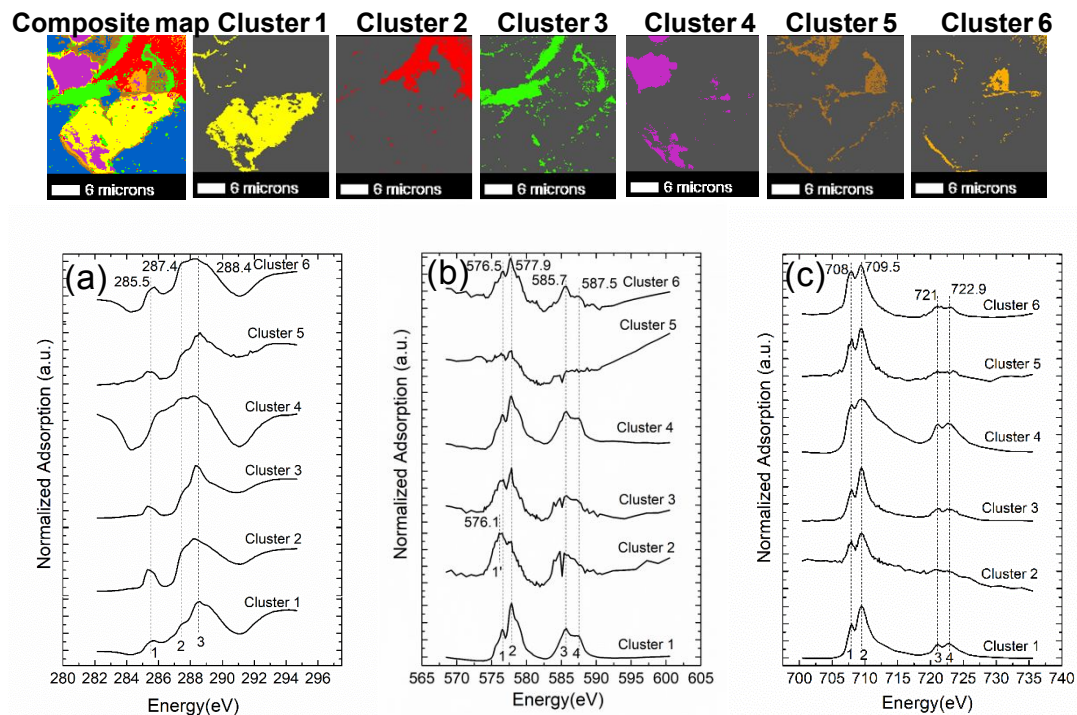

Figure S4. The PCA-cluster results of the sorption OFC sample synthesized using rape-derived DOC under the Fe/C molar ratio of 0.1 (Sor\_Ra\_0.1). Corresponding C K-edge, Cr and Fe L<sub>3,2</sub>-edge XANES spectra of each cluster identified is shown in (a), (b) and (c), respectively.

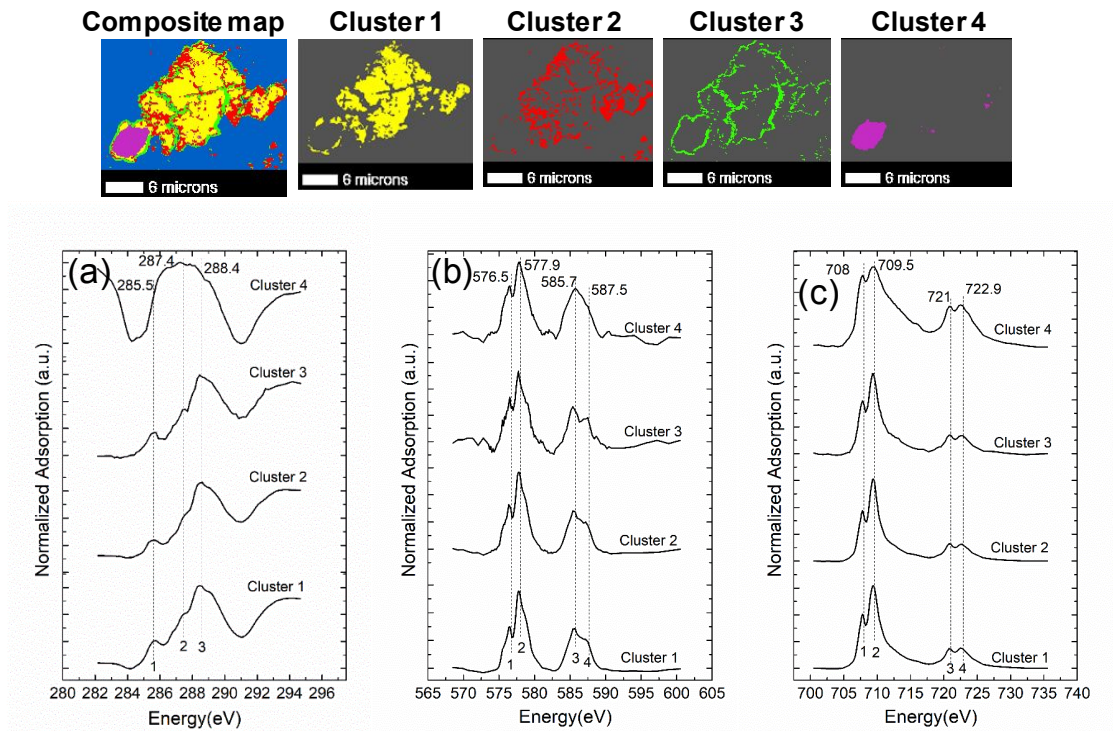

146

147 Figure S5. The PCA-cluster results of the co-precipitation OFC sample synthesized using  
148 rice-derived DOC under the Fe/C molar ratio of 0.1 (Cop\_Ri\_0.1). Corresponding C K-edge, Cr  
149 and Fe L<sub>3,2</sub>-edge XANES spectra of each cluster identified is shown in (a), (b) and (c),  
150 respectively.

151

152

153

154

155

156

157

158

159

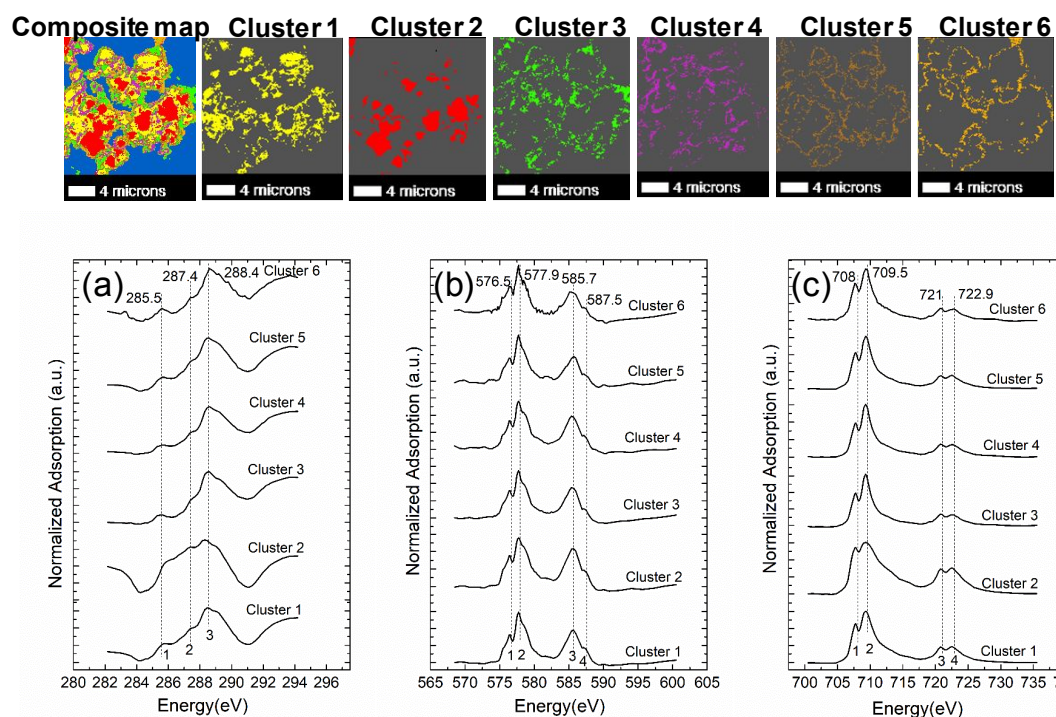

Figure S6. The PCA-cluster results of the co-precipitation OFC sample synthesized using rape-derived DOC under the Fe/C molar ratio of 0.1 (Cop\_Ra\_0.1). Corresponding C K-edge, Cr and Fe L<sub>3,2</sub>-edge XANES spectra of each cluster identified is shown in (a), (b) and (c), respectively.

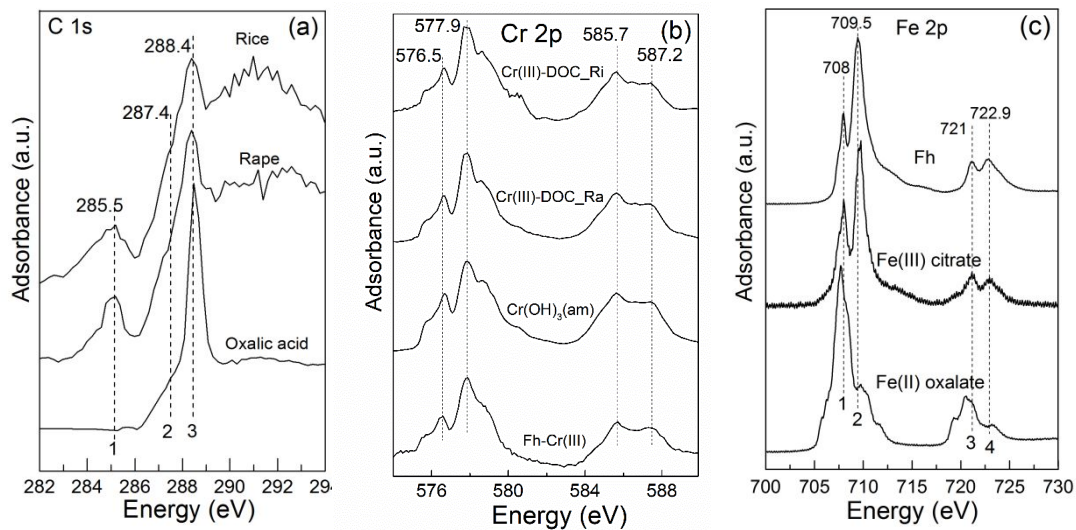

169

Figure S7. The XANES spectra at the C K-edge of rice (DOC\_Ri) and rape derived DOC (DOC\_Ra) (a), at the Cr L<sub>3,2</sub>-edge of organo-Cr(III) complexes formed using DOC\_Ri and DOC\_Ra, amorphous Cr(OH)<sub>3</sub>(am) and Cr(III) adsorbed on Fh (Fh-Cr(III)) (b) and Fe L<sub>3,2</sub>-edge of ferrihydrite (Fh), Fe(III) citrate and Fe(II) oxalate (c) from previous studies,<sup>9, 10</sup> respectively.

175

176

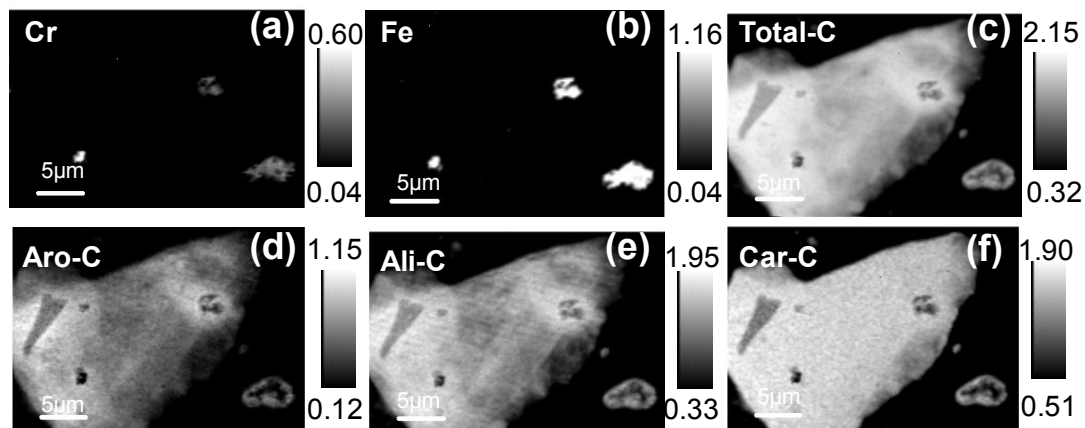

177

Figure S8. Submicro-scale distribution of Cr (a), Fe (b), total C (c, Total-C), aromatic carbon (d, Aro-C), aliphatic carbon (e, Ali-C) and carboxylic carbon (f, Car-C) in the sorption OFC sample, synthesized using rice-derived DOC under the Fe/C molar ratio of 0.1 (Sor\_Ri\_0.1) determined by STXM.

181

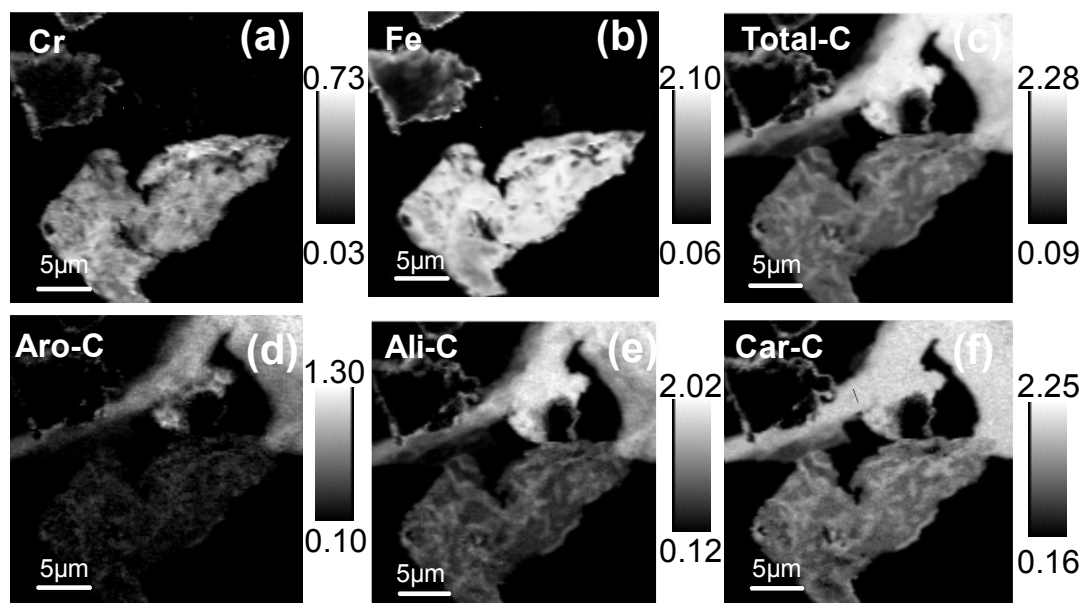

Figure S9. Submicro-scale distribution of Cr (a), Fe (b), total C (c, Total-C), aromatic carbon (d, Aro-C), aliphatic carbon (e, Ali-C) and carboxylic carbon (f, Car-C) in the sorption OFC sample, synthesized using rape-derived DOC under the Fe/C molar ratio of 0.1 (Sor\_Ra\_0.1 ) determined by STXM.

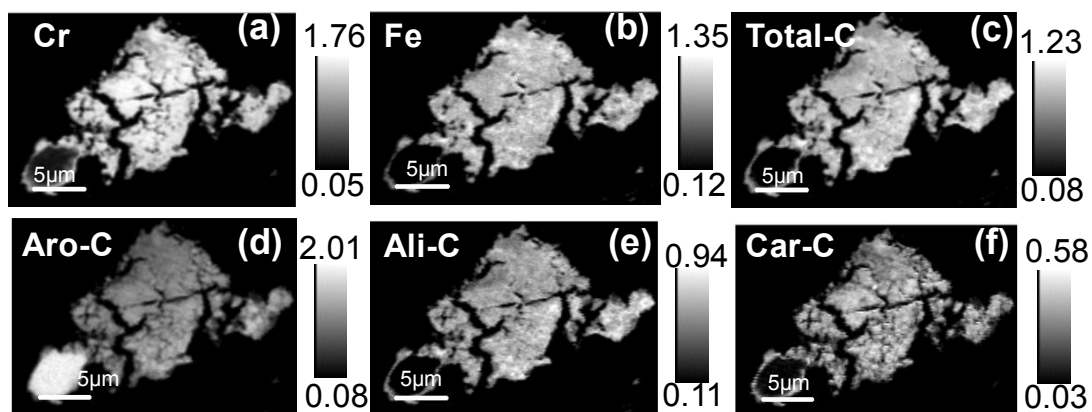

Figure S10. Submicro-scale distribution of Cr (a), Fe (b), total C (c, Total-C), aromatic carbon (d, Aro-C), aliphatic carbon (e, Ali-C) and carboxylic carbon (f, Car-C) in the co-precipitation OFC sample, synthesized using rice-derived DOC under the Fe/C molar ratio of 0.1 (Cop\_Ri\_0.1) determined by STXM.

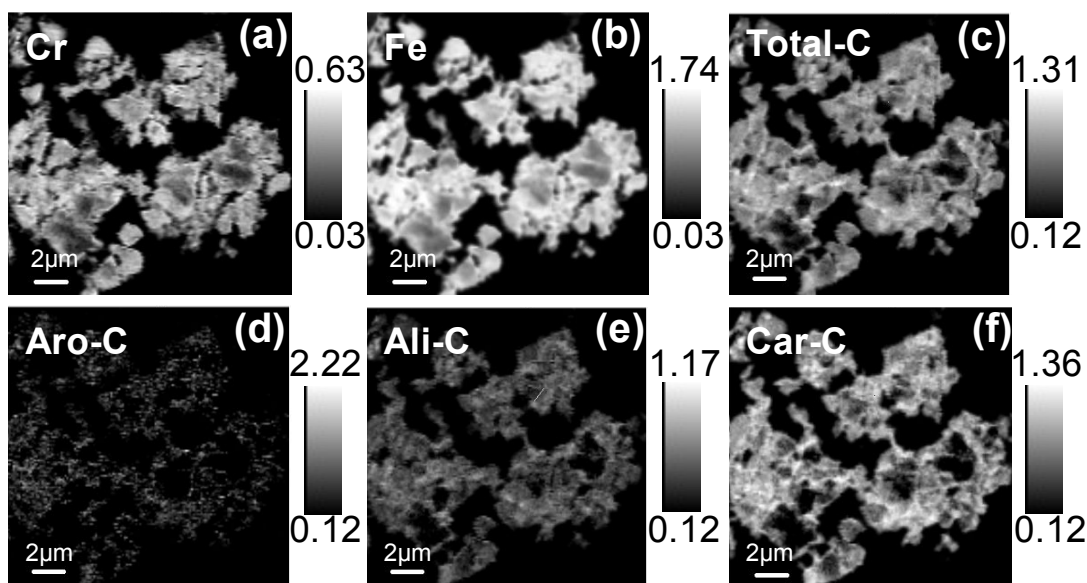

Figure S11. Submicro-scale distribution of Cr (a), Fe (b), total C (c, Total-C), aromatic carbon(d, Aro-C), aliphatic carbon (e, Ali-C) and carboxylic carbon (f, Car-C) in the co-precipitation OFC sample, synthesized using rape-derived DOC under the Fe/C molar ratio of 0.1 (Cop\_Ra\_0.1) determined by STXM.

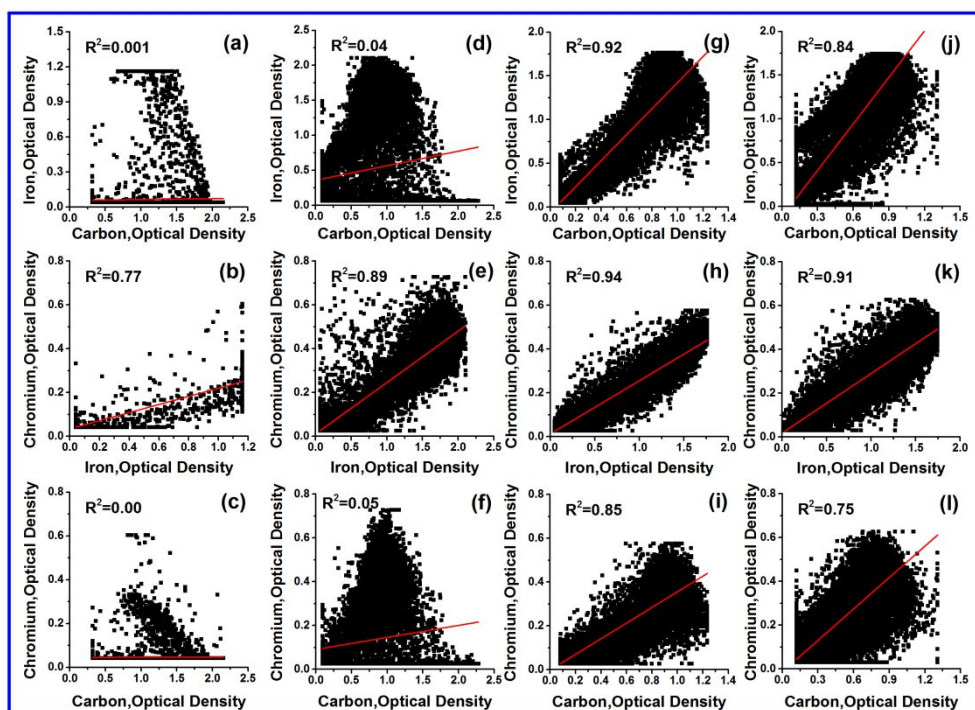

Figure S12. The elemental optical density correlation plots among C, Fe, and Cr for the sorption samples synthesized under the Fe/C molar ratio of 0.1 using rice- (Sor\_Ri\_0.1, a-c)

and rape-derived DOC (Sor\_Ra\_0.1, d-f), as well as the co-precipitation OFC samples under the Fe/C molar ratio of 0.1 using rice- (Cop\_Ri\_0.1, g-h) and rape-derived DOC (Cop\_Ra\_0.1, j-l), respectively.

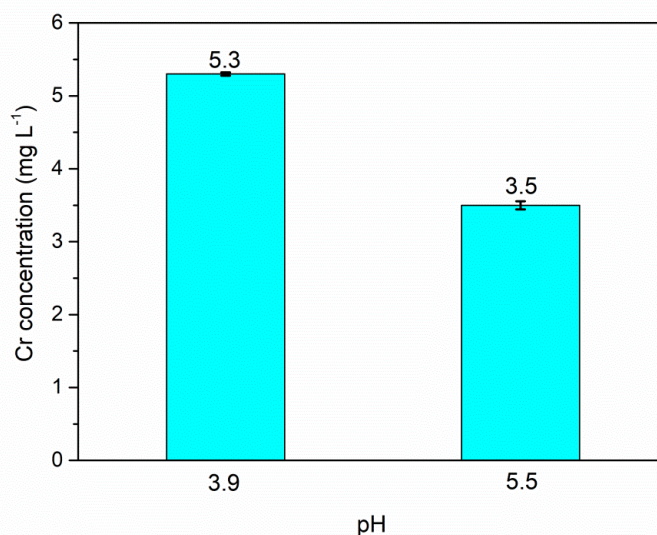

Figure S13. Concentrations of Cr in the supernatants of solutions containing 0.1 mM CrCl<sub>3</sub> and 10 mM NaCl at pH 3.9 (mean value, 5.3) and pH 5.5 (mean value, 3.5) after 24 h shaking.

## References

1. Cornell, R. M.; Schwertmann, U., The iron oxides: structure, properties, reactions, occurrences and uses. Second Edition[M]. 2004.
2. Charlet, L.; Manceau, A. A., X-ray absorption spectroscopic study of the sorption of Cr(III) at the oxide-water interface II. Adsorption, coprecipitation, and surface precipitation on hydrous ferric oxide. *J Colloid Interf. Sci* **1992**, *148*, (2), 443-458.
3. Zhang, H. L.; Liang, S. T.; Luo, M. T.; Ma, M. G.; Fan, P. P.; Xu, H. B.; Li, P.; Zhang, Y., Preparation and color performance control of Cr<sub>2</sub>O<sub>3</sub> green pigment through thermal decomposition of chromium hydroxide precursor. *Mater. Lett* **2014**, *117*, 244-247.
4. Papassiopi, N.; Pinakidou, F.; Katsikini, M.; Antipas, G. S. E.; Christou, C.; Xenidis, A.; Paloura, E. C., A XAFS study of plain and composite iron(III) and chromium(III) hydroxides. *Chemosphere* **2014**, *111*, 169-176.
5. Laubengayer, A. W.; McCune, H. W., New crystalline phases in the system

- 225 chromium(III) oxide—water<sup>1</sup>. *J. Am. Chem. Soc* **1952**, 74, (9), 2362-2364.
- 226 6. Yang, J.; Zhu, S.; Zheng, C.; Sun, L.; Liu, J.; Shi, J., Impact of S fertilizers on pore-water  
227 Cu dynamics and transformation in a contaminated paddy soil with various flooding periods.  
228 *J Hazard Mater* **2015**, 286, 432-9.
- 229 7. Liu, J.; Yang, J.; Zeng, X.; Wang, J.; Sparks, D., Fe(III)-induced sequestration of citric  
230 acid on kaolinite surface probed by STXM-NEXAFS spectroscopy. *Acta Chim. Sinica* **2017**,  
231 75, (6), 617-620.
- 232 8. Ravel, B.; Newville, M., ATHENA, ARTEMIS, HEPHAESTUS: data analysis for X-ray  
233 absorption spectroscopy using IFEFFIT. *J. Synchrotron. Radiat* **2005**, 12, 537-541.
- 234 9. Yang, J.; Wang, J.; Pan, W.; Regier, T.; Hu, Y.; Rumpel, C.; Bolan, N.; Sparks, D.,  
235 Retention mechanisms of citric acid in ternary kaolinite-Fe(III)-citrate acid systems using Fe  
236 K-edge EXAFS and L-3,L-2-edge XANES spectroscopy. *Sci. Rep* **2016**, 6.
- 237 10. Yang, J.; Wang, J., Radiation chemistry of molecular compounds and polymers by soft  
238 X-ray spectroscopy and microscopy. *Can. J. Chem* **2017**, 95, (11), 1191-1197.
